# Supplementary material
Source: PubMed Central journal article supplement (PMC3143362)

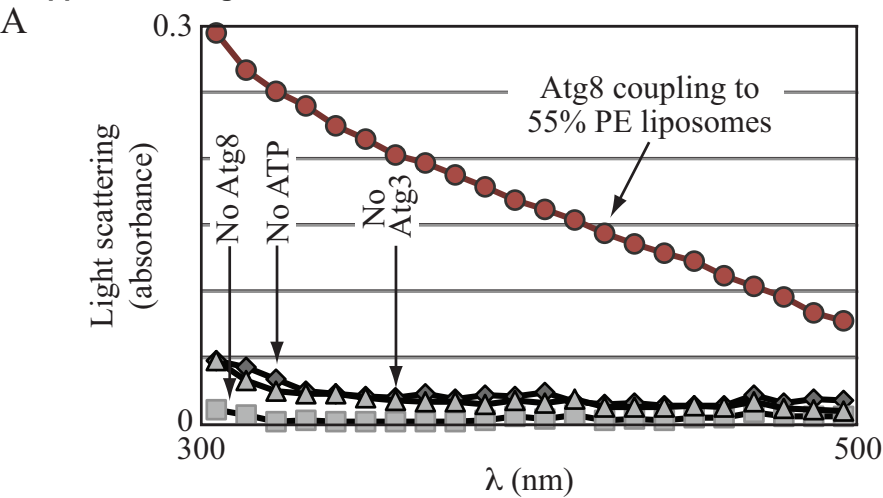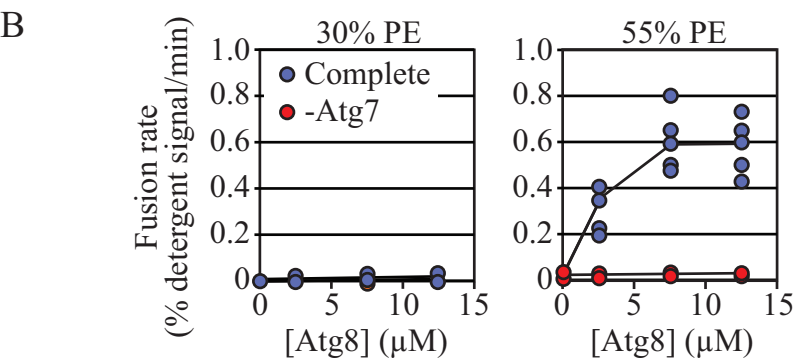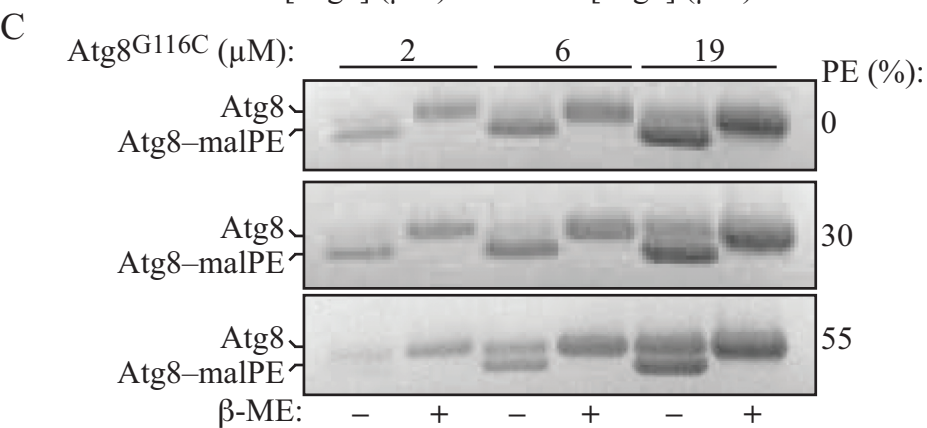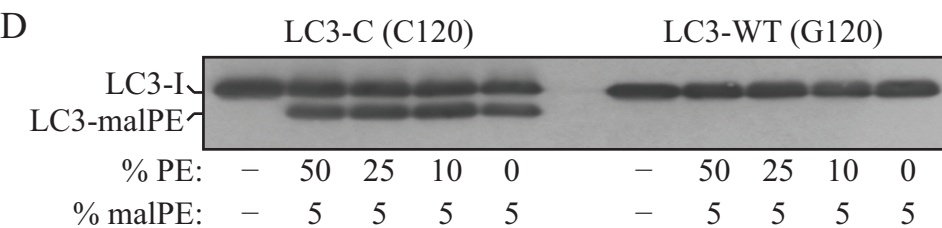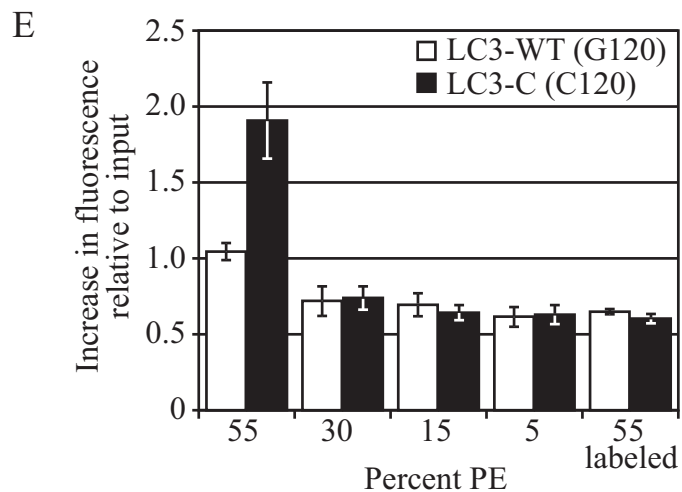

A

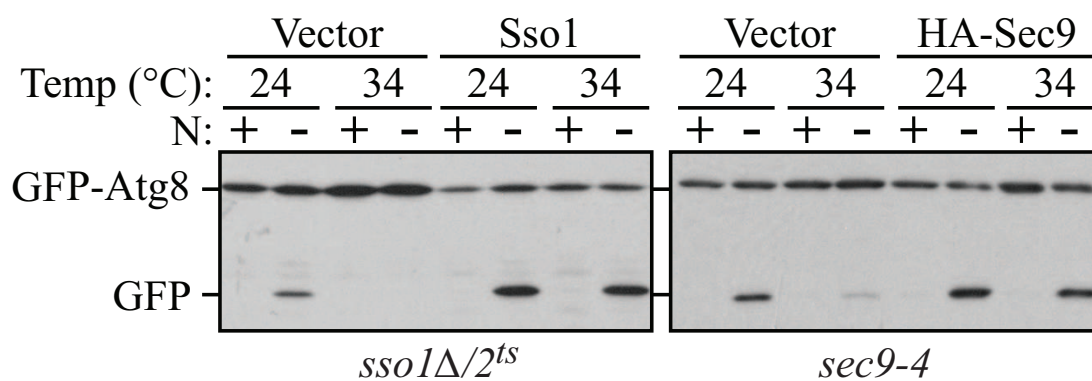

B

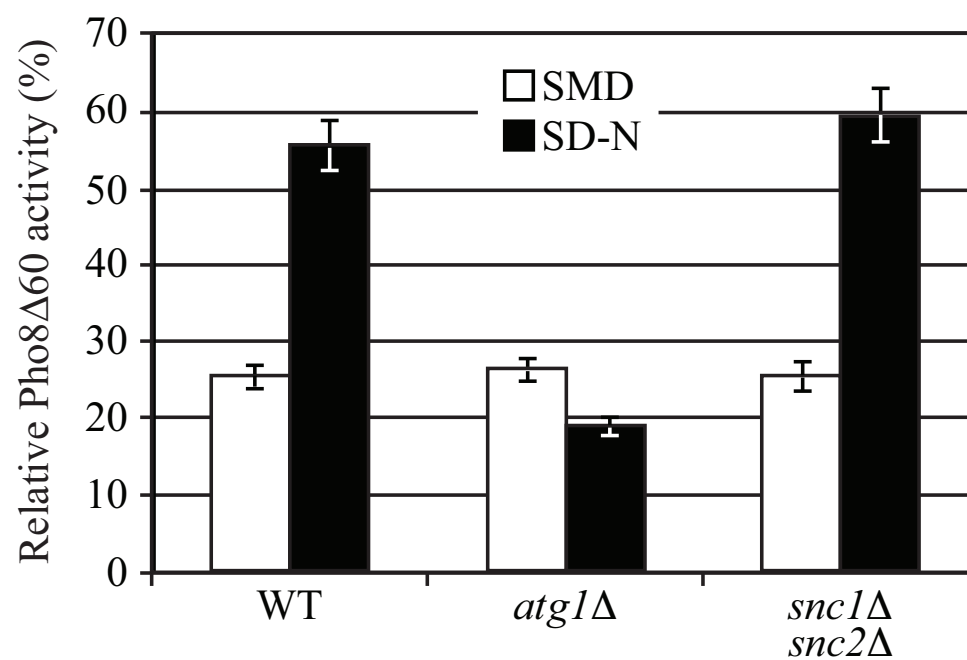

C

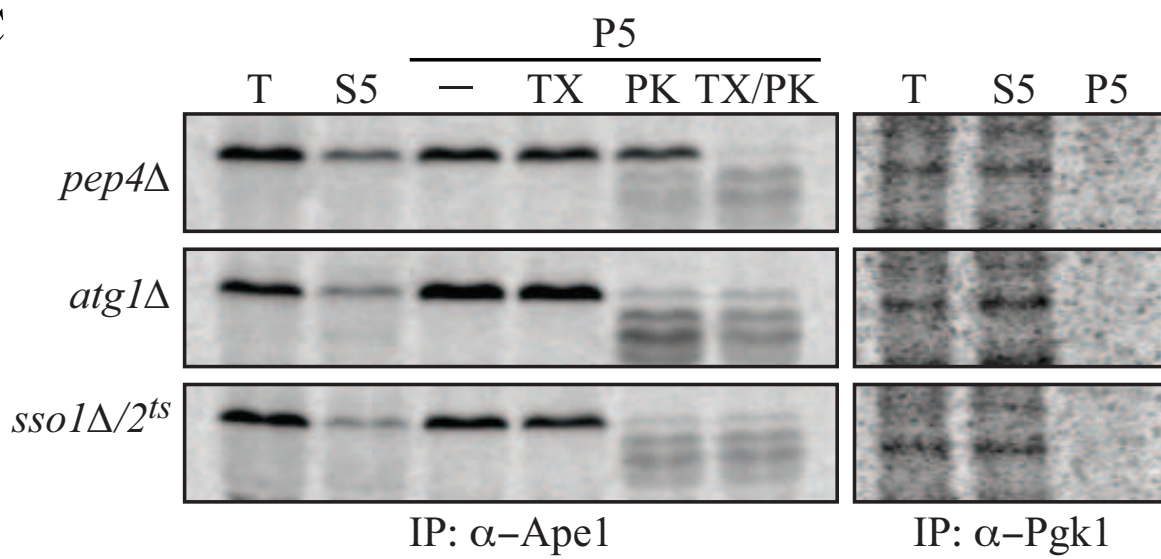

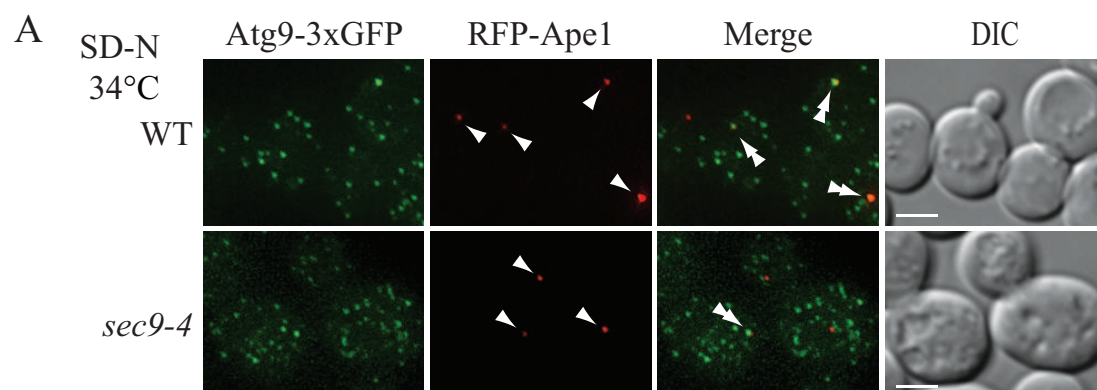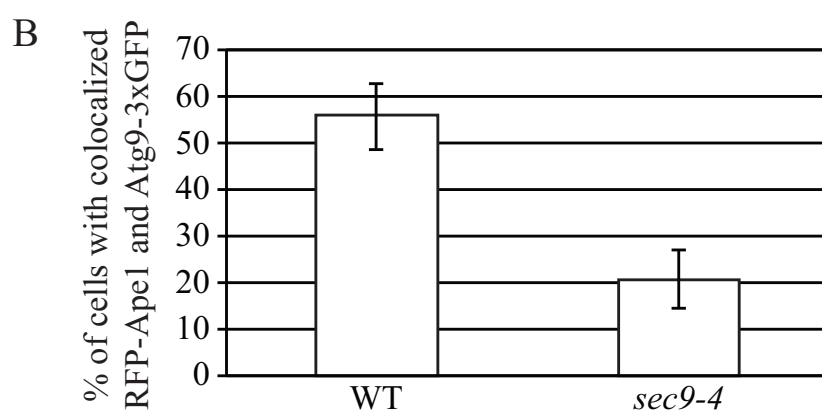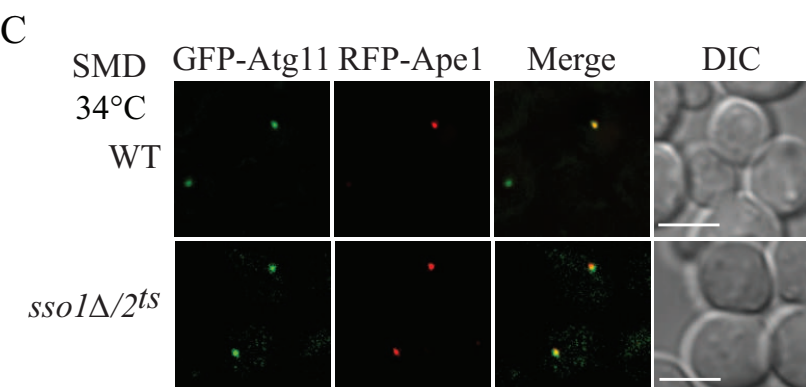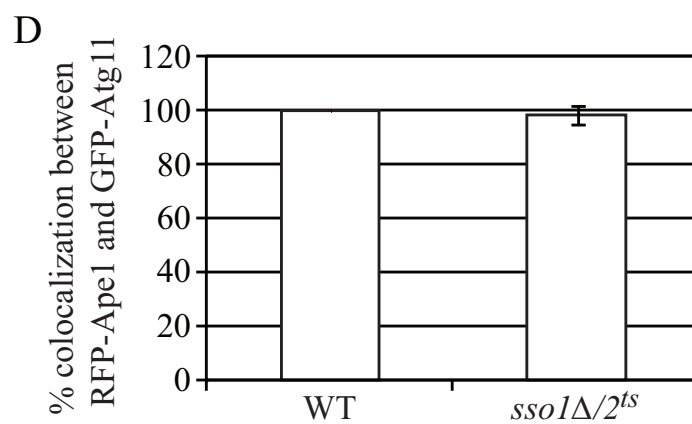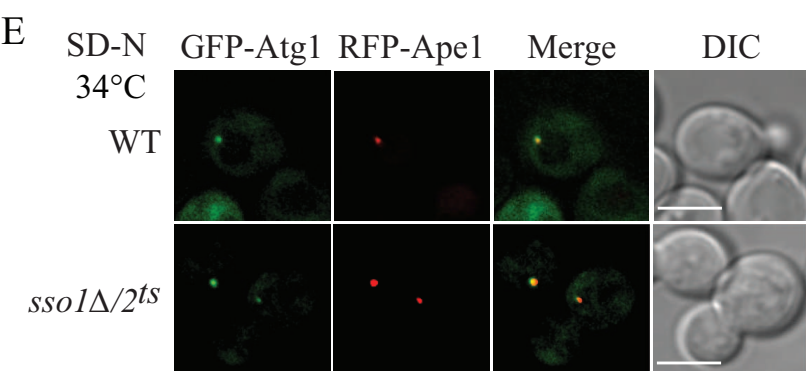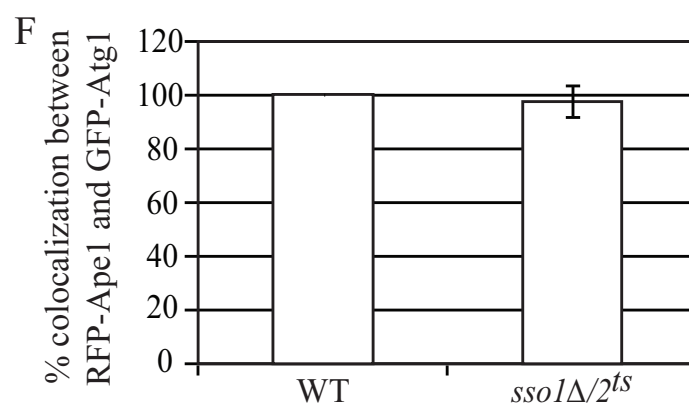



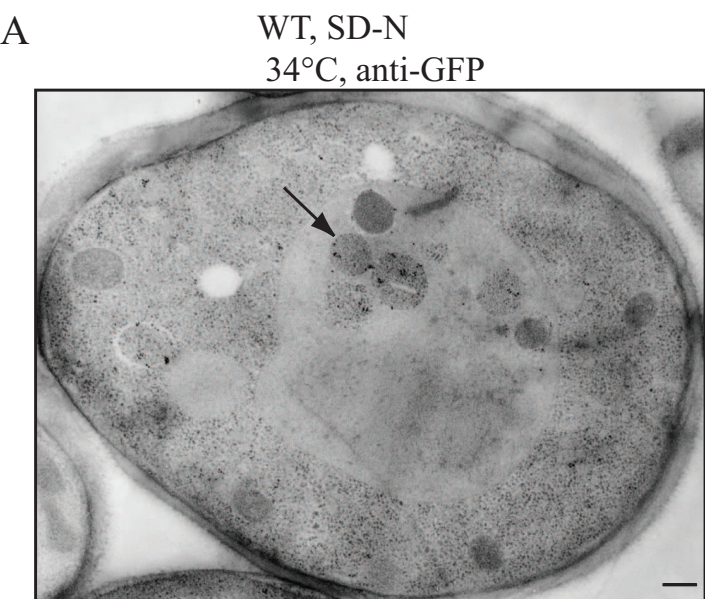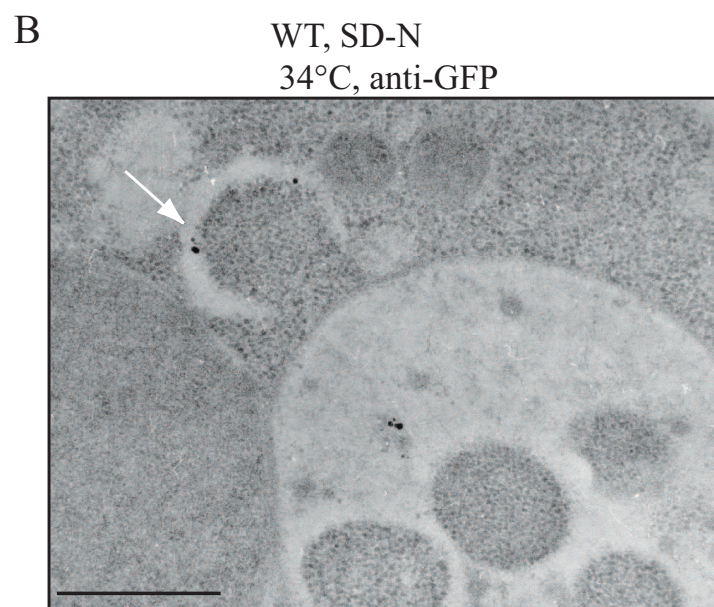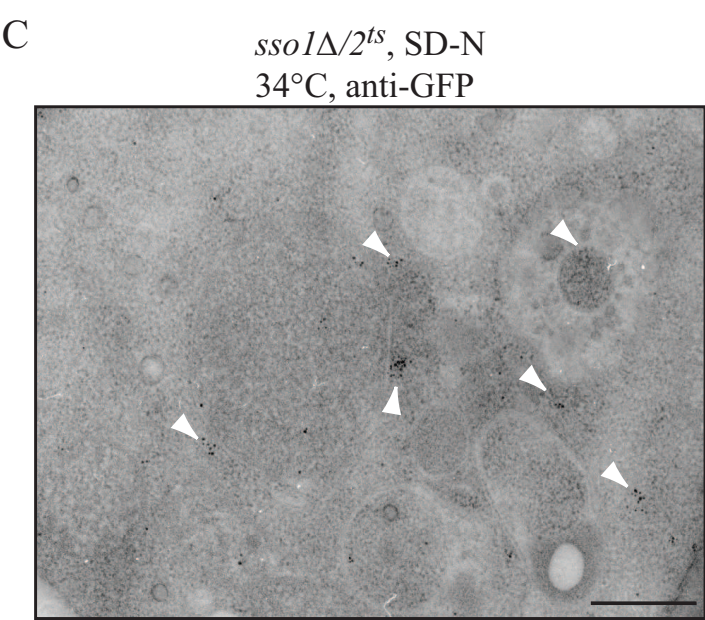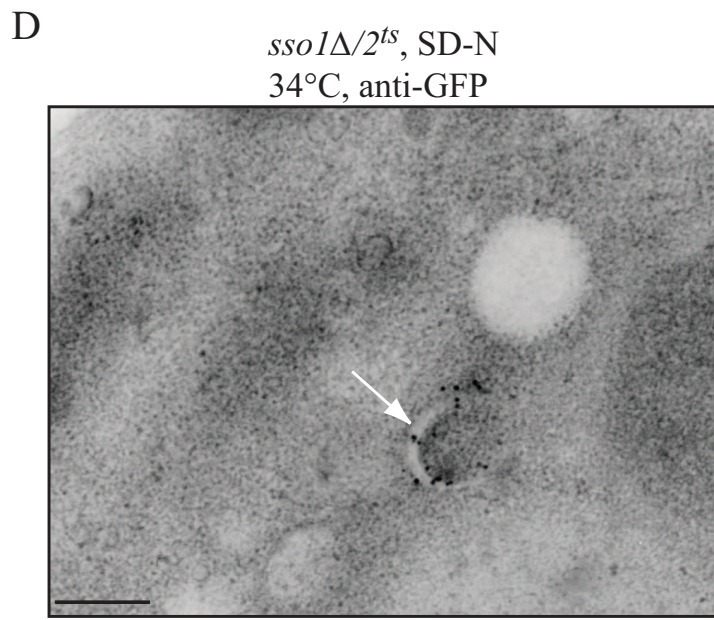

A

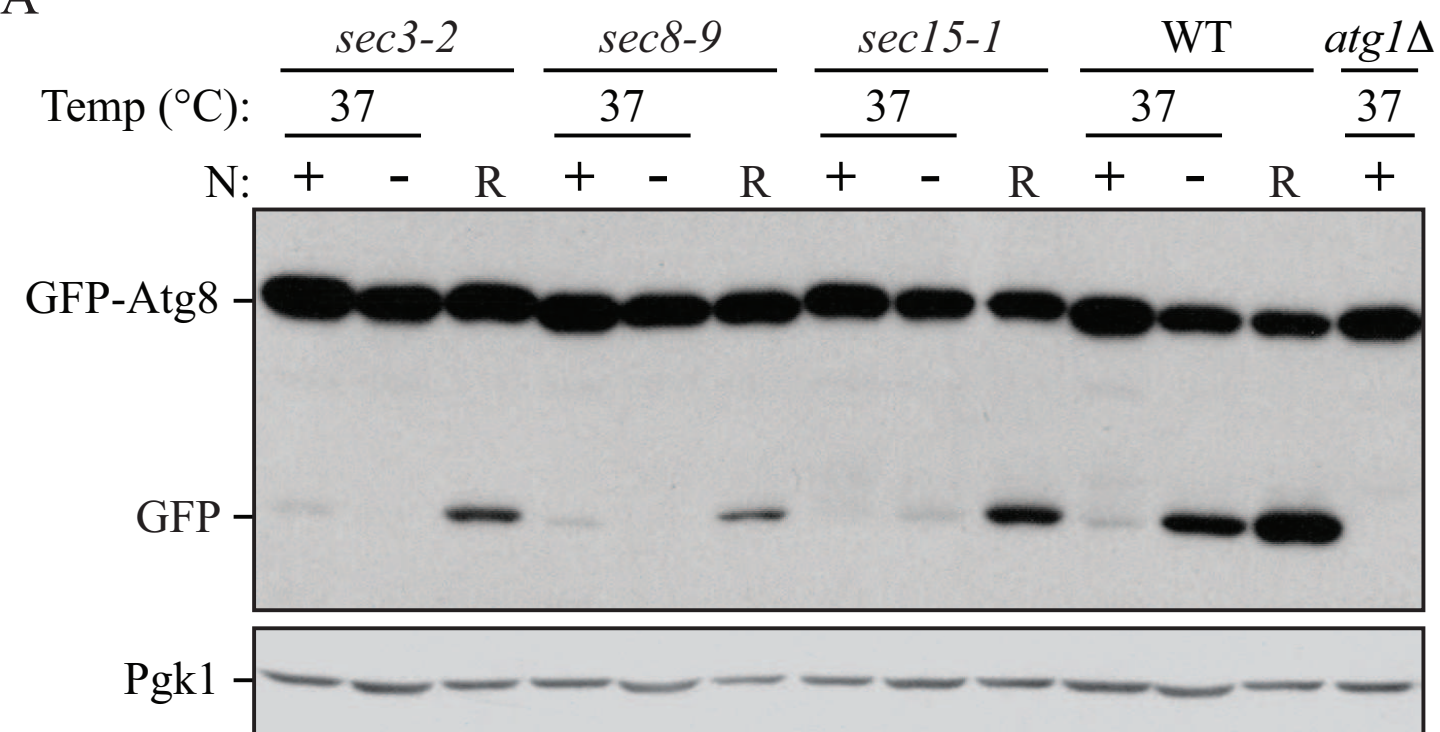

B

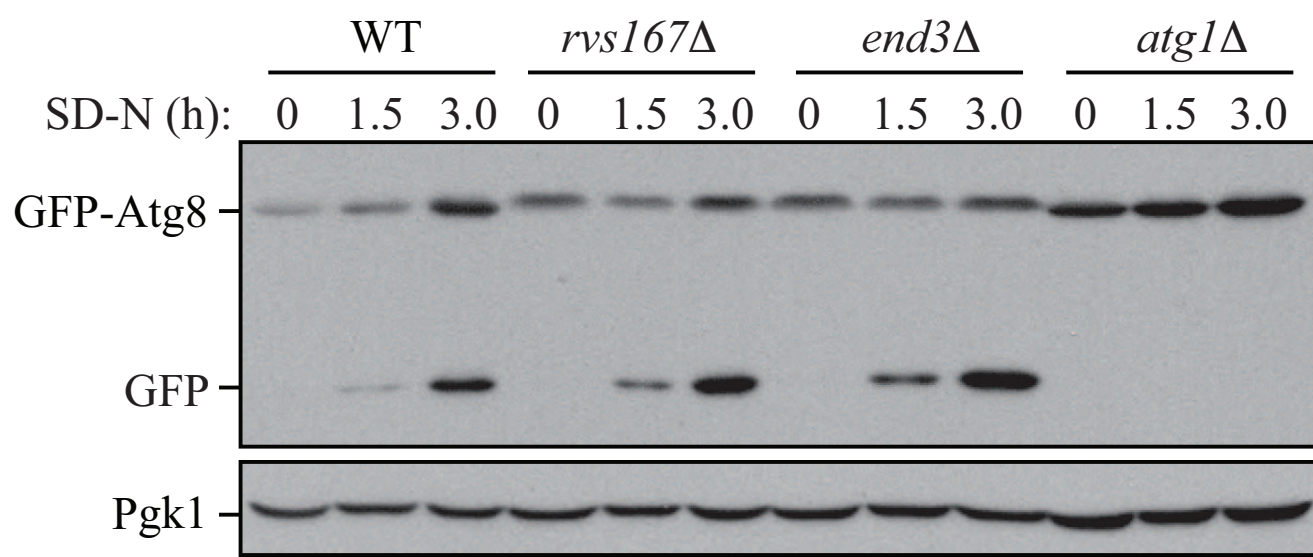

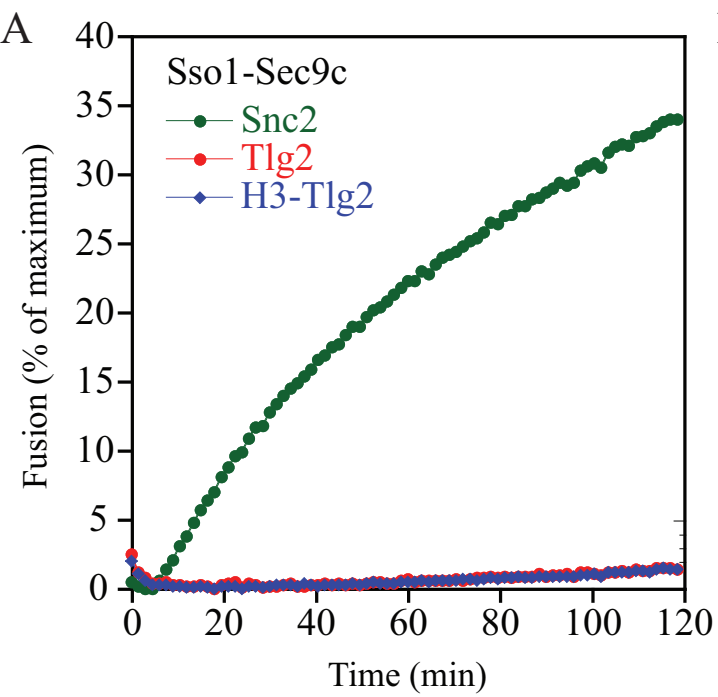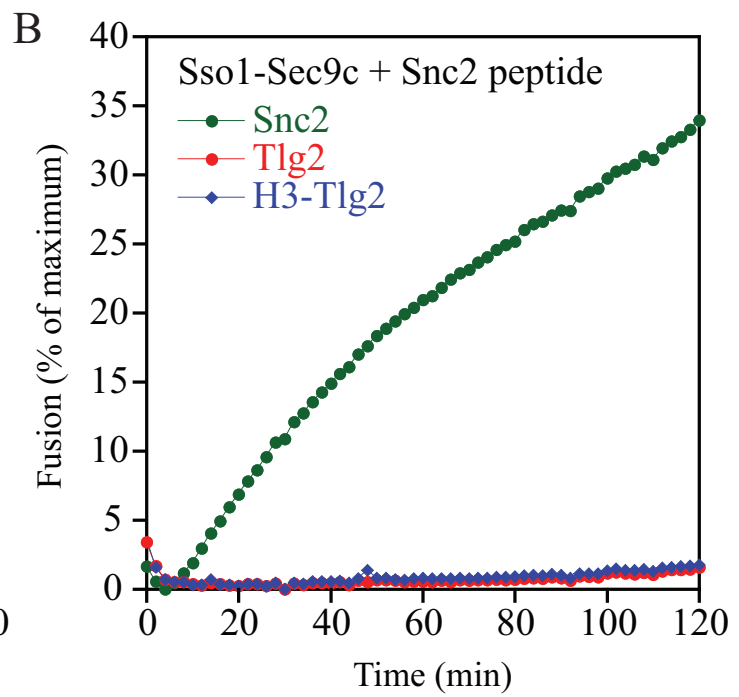



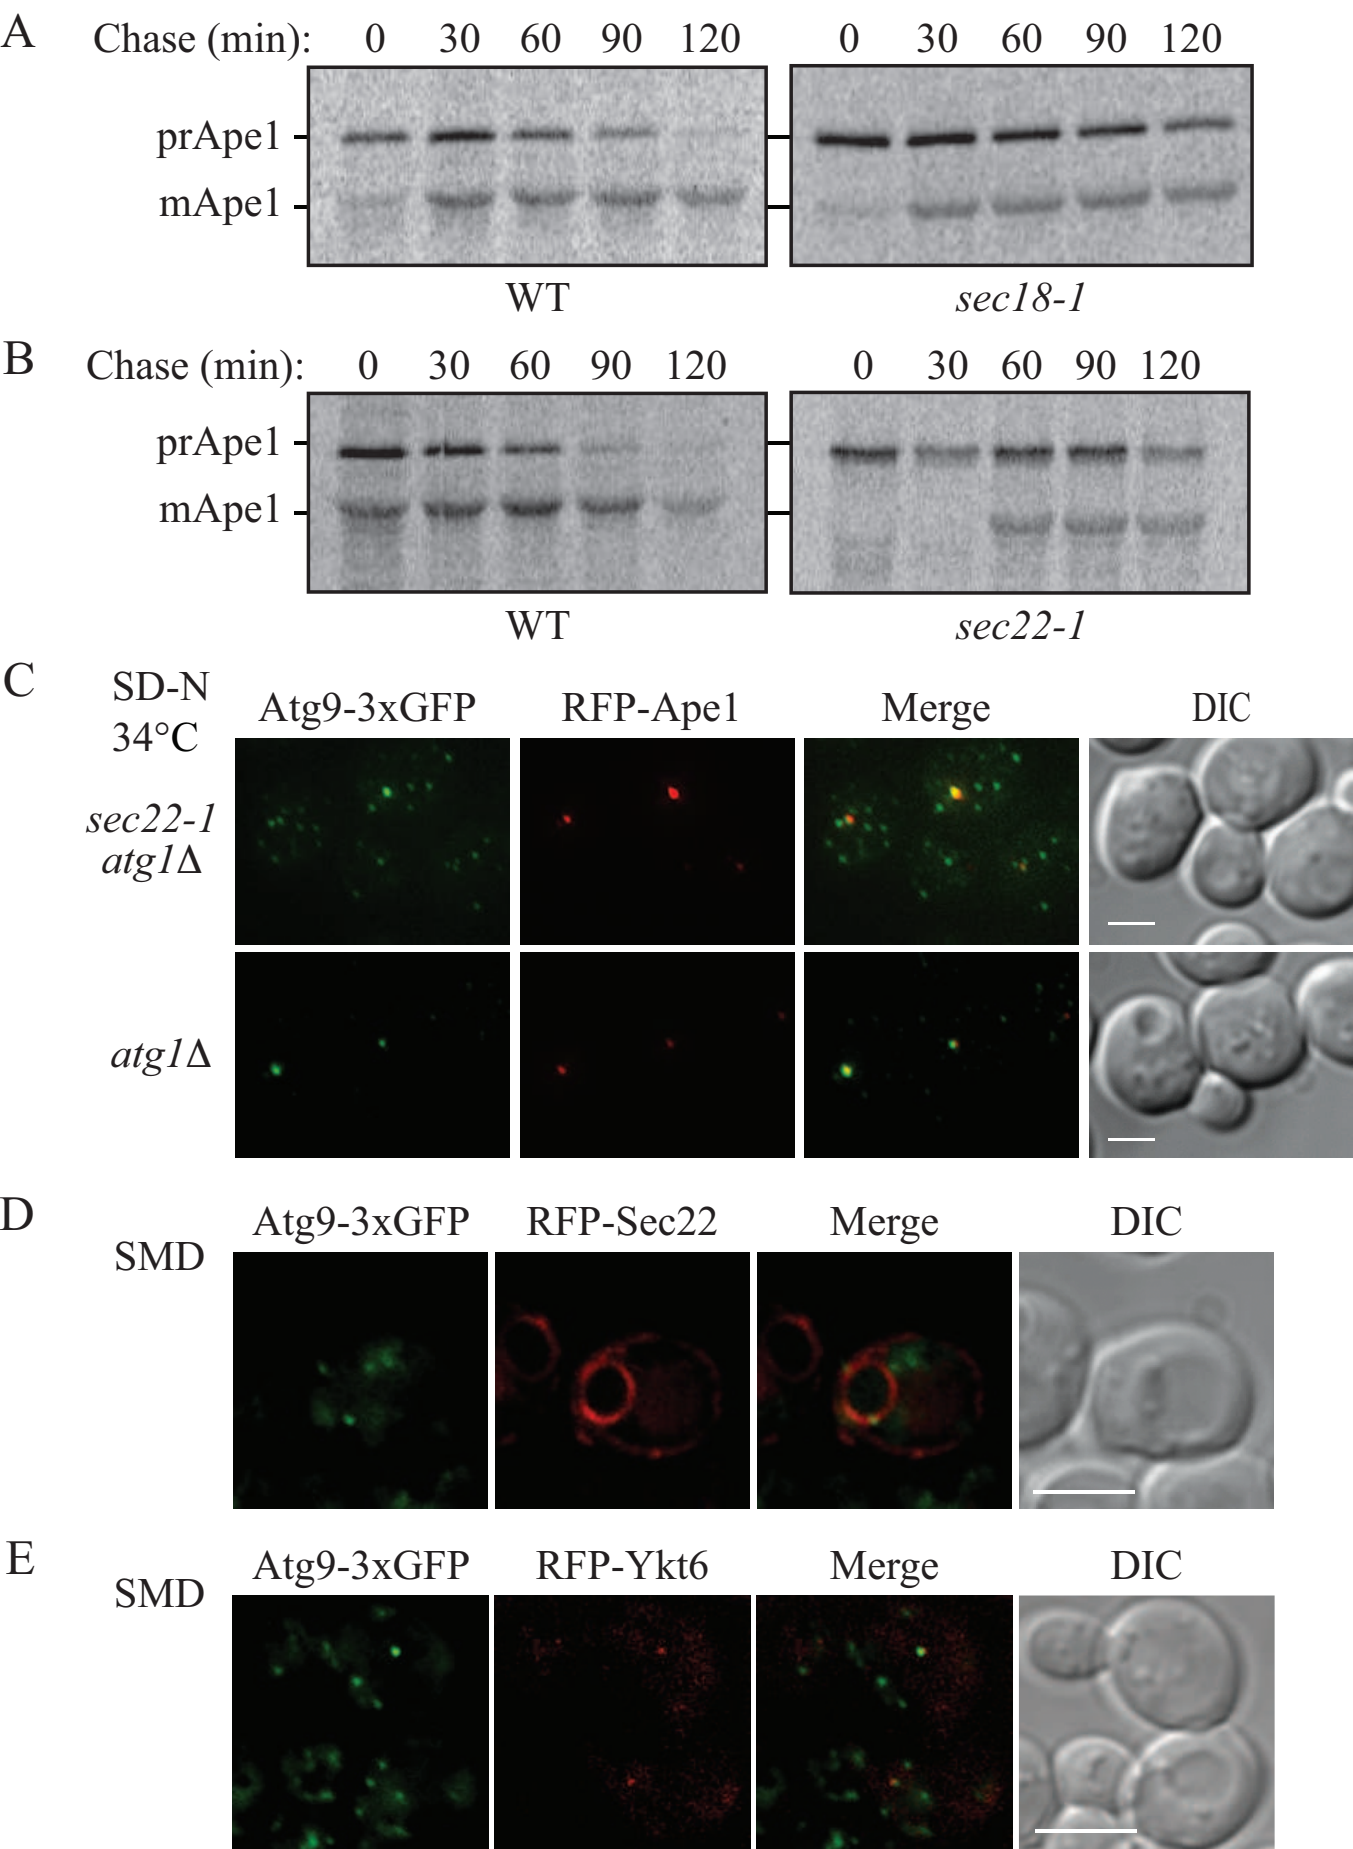

Supplement: NIHMS306376-supplement-02.pdf [file NIHMS306376-supplement-02.pdf]
